# Supplementary material
Source: PubMed Central journal article supplement (PMC9050177)
Supplement: 580_2022_3351_MOESM1_ESM.pdf [file 580_2022_3351_MOESM1_ESM.pdf]

| Calibrator       | Well        | Mean OD value(U/ml) |
|------------------|-------------|---------------------|
| <b>1</b>         | H1 and H2   | 0.25                |
| <b>2.5</b>       | H3 and H4   | 0.14                |
| <b>5</b>         | H5 and H6   | 0.08                |
| <b>10</b>        | H7 and H8   | 0.07                |
| Positive control | H11 and H12 | 0.08                |

Net OD values of camel calibrators and positive control

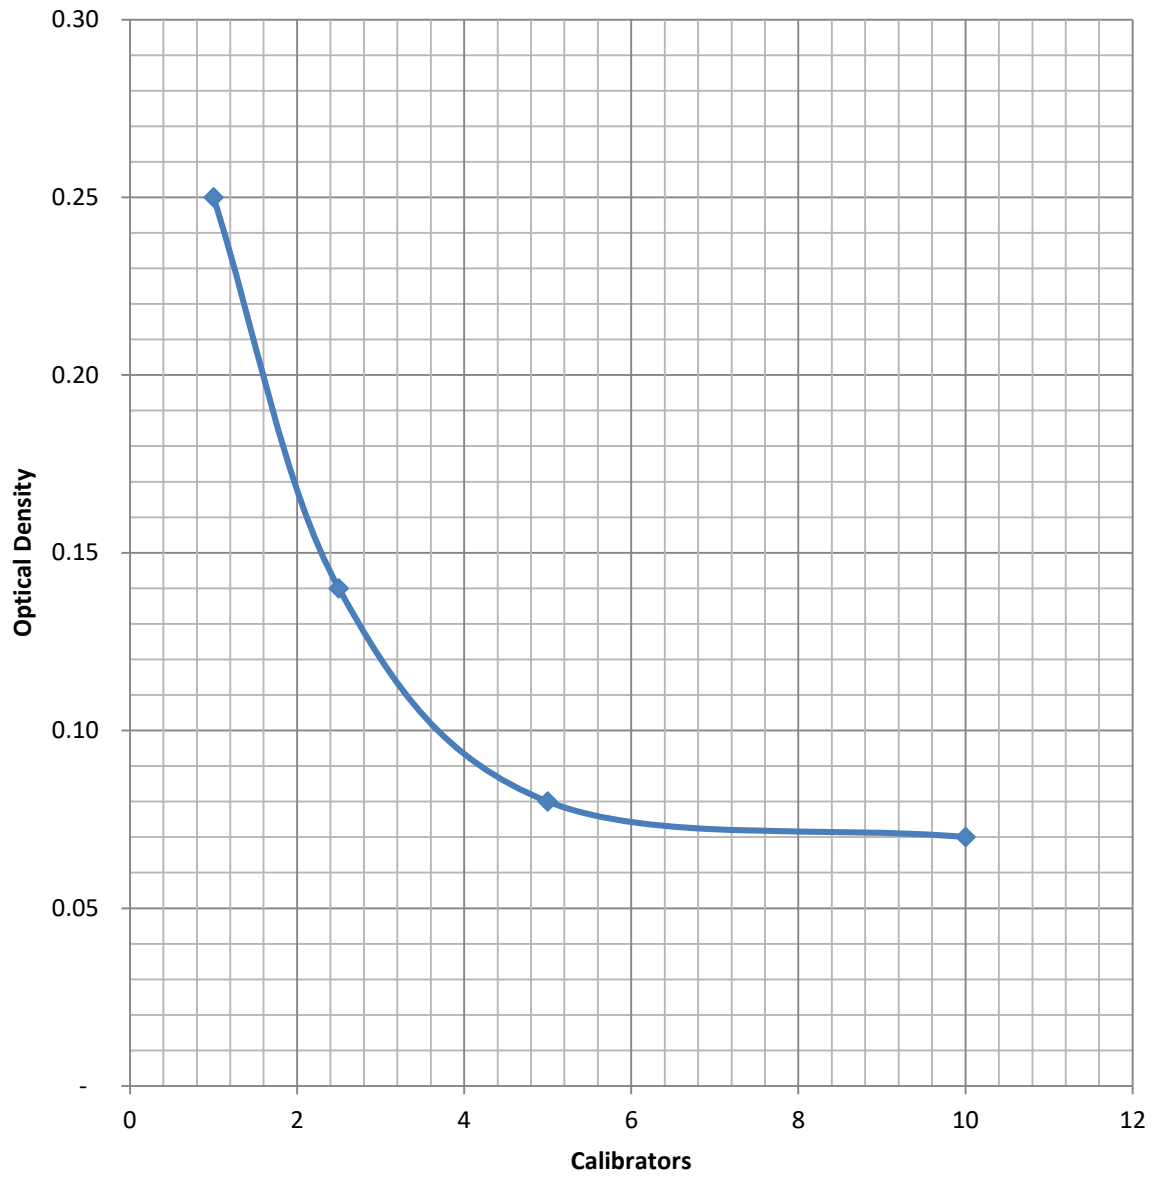

Graph showing obtained OD values for calibrators of camel ELISA
