# Supplementary material
Source: PubMed Central journal article supplement (PMC9050177)
Supplement: 580_2022_3351_MOESM2_ESM.pdf [file 580_2022_3351_MOESM2_ESM.pdf]

1 - Camel

28/11/16 4.13  
Primary Filter : 450 nm

|   | 1     | 2     | 3     | 4     |
|---|-------|-------|-------|-------|
| A | 0.142 | 0.099 | 0.098 | 0.090 |
| B | 0.127 | 0.103 | 0.106 | 0.119 |
| C | 0.164 | 0.144 | 0.111 | 0.209 |
| D | 0.077 | 0.077 | 0.079 | 0.083 |
| E | 0.113 | 0.077 | 0.112 | 0.093 |
| F | 0.083 | 0.088 | 0.099 | 0.113 |
| G | 0.077 | 0.081 | 0.078 | 0.089 |
| H | 0.294 | 0.202 | 0.149 | 0.126 |

|   | 5     | 6     | 7     | 8     |
|---|-------|-------|-------|-------|
| A | 0.107 | 0.094 | 0.090 | 0.106 |
| B | 0.119 | 0.115 | 0.155 | 0.131 |
| C | 0.113 | 0.111 | 0.163 | 0.189 |
| D | 0.090 | 0.095 | 0.088 | 0.077 |
| E | 0.085 | 0.075 | 0.098 | 0.100 |
| F | 0.127 | 0.173 | 0.080 | 0.071 |
| G | 0.081 | 0.086 | 0.088 | 0.078 |
| H | 0.076 | 0.078 | 0.070 | 0.077 |

|   | 9     | 10    | 11    | 12    |
|---|-------|-------|-------|-------|
| A | 0.269 | 0.098 | 0.121 | 0.148 |
| B | 0.126 | 0.111 | 0.114 | 0.123 |
| C | 0.172 | 0.145 | 0.111 | 0.104 |
| D | 0.073 | 0.069 | 0.076 | 0.081 |
| E | 0.076 | 0.074 | 0.112 | 0.080 |
| F | 0.085 | 0.078 | 0.083 | 0.071 |
| G | 0.100 | 0.114 | 0.117 | 0.133 |
| H | 0.072 | 0.069 | 0.079 | 0.071 |

CV = 36.9%
