# Supplementary material
Source: PubMed Central journal article supplement (PMC9050177)
Supplement: 580_2022_3351_MOESM3_ESM.pdf [file 580_2022_3351_MOESM3_ESM.pdf]

2 - Humans \*

28/11/16 14:13  
Primary Filter : 450 nm

|   | 1     | 2     | 3     | 4     |
|---|-------|-------|-------|-------|
| A | 0.164 | 0.087 | 0.098 | 0.103 |
| B | 0.682 | 0.106 | 0.116 | 0.113 |
| C | 0.225 | 0.117 | 0.111 | 0.106 |
| D | 0.105 | 0.105 | 0.085 | 0.076 |
| E | 0.134 | 0.085 | 0.071 | 0.068 |
| F | 0.084 | 0.065 | 0.059 | 0.092 |
| G | 0.089 | 0.067 | 0.088 | 0.085 |
| H | 0.324 | 0.201 | 0.286 | 0.310 |

|   | 5     | 6     | 7     | 8     |
|---|-------|-------|-------|-------|
| A | 0.113 | 0.100 | 0.161 | 0.128 |
| B | 0.103 | 0.117 | 0.124 | 0.174 |
| C | 0.110 | 0.110 | 0.103 | 0.105 |
| D | 0.115 | 0.090 | 0.396 | 0.110 |
| E | 0.095 | 0.099 | 0.095 | 0.086 |
| F | 0.064 | 0.075 | 0.079 | 0.082 |
| G | 0.088 | 0.219 | 0.071 | 0.086 |
| H | 0.105 | 0.086 | 0.069 | 0.095 |

|   | 9     | 10    | 11    | 12    |
|---|-------|-------|-------|-------|
| A | 0.105 | 0.100 | 0.115 | 1.326 |
| B | 0.111 | 0.138 | 0.170 | 0.144 |
| C | 0.117 | 0.109 | 0.159 | 0.136 |
| D | 0.086 | 0.080 | 0.171 | 0.084 |
| E | 0.215 | 0.148 | 0.284 | 0.099 |
| F | 0.102 | 0.074 | 0.085 | 1.026 |
| G | 0.168 | 0.095 | 0.132 | 0.156 |
| H | 0.083 | 0.111 | 0.142 | 0.159 |

CV = 114.7%
