# Supplementary material
Source: PubMed Central journal article supplement (PMC9050177)
Supplement: 580_2022_3351_MOESM4_ESM.pdf [file 580_2022_3351_MOESM4_ESM.pdf]

Threshold index for camel samples

**Threshold index for positive control** = mean net OD for +ve control

÷ mean net OD for 1U/ml = **0.32**

| Sample | well  | Average/Net OD | Threshold Index |
|--------|-------|----------------|-----------------|
| 1      | 0.142 | 0.1205         | 0.4820          |
|        | 0.099 |                |                 |
| 2      | 0.098 | 0.094          | 0.3760          |
|        | 0.09  |                |                 |
| 3      | 0.107 | 0.107          | 0.4280          |
| 4      | 0.094 | 0.094          | 0.3760          |
| 5      | 0.090 | 0.09           | 0.3600          |
| 6      | 0.106 | 0.106          | 0.4240          |
| 7      | 0.269 | 0.269          | 1.0760          |
| 8      | 0.098 | 0.098          | 0.3920          |
| 9      | 0.121 | 0.121          | 0.4840          |
| 10     | 0.148 | 0.148          | 0.5920          |
| 11     | 0.127 | 0.127          | 0.5080          |
| 12     | 0.103 | 0.103          | 0.4120          |
| 13     | 0.106 | 0.106          | 0.4240          |
| 14     | 0.119 | 0.119          | 0.4760          |
| 15     | 0.119 | 0.119          | 0.4760          |
| 16     | 0.115 | 0.115          | 0.4600          |
| 17     | 0.155 | 0.155          | 0.6200          |
| 18     | 0.131 | 0.131          | 0.5240          |

|    |       |       |        |
|----|-------|-------|--------|
| 19 | 0.126 | 0.126 | 0.5040 |
| 20 | 0.111 | 0.111 | 0.4440 |
| 21 | 0.114 | 0.114 | 0.4560 |
| 22 | 0.123 | 0.123 | 0.4920 |
| 23 | 0.164 | 0.164 | 0.6560 |
| 24 | 0.144 | 0.144 | 0.5760 |
| 25 | 0.111 | 0.111 | 0.4440 |
| 26 | 0.209 | 0.209 | 0.8360 |
| 27 | 0.113 | 0.113 | 0.4520 |
| 28 | 0.115 | 0.115 | 0.4600 |
| 29 | 0.163 | 0.163 | 0.6520 |
| 30 | 0.189 | 0.189 | 0.7560 |
| 31 | 0.172 | 0.172 | 0.6880 |
| 32 | 0.145 | 0.145 | 0.5800 |
| 33 | 0.111 | 0.111 | 0.4440 |
| 34 | 0.104 | 0.104 | 0.4160 |
| 35 | 0.077 | 0.077 | 0.3080 |
| 36 | 0.077 | 0.077 | 0.3080 |
| 37 | 0.079 | 0.079 | 0.3160 |
| 38 | 0.083 | 0.083 | 0.3320 |
| 39 | 0.090 | 0.090 | 0.3600 |
| 40 | 0.095 | 0.095 | 0.3800 |
| 41 | 0.088 | 0.088 | 0.3520 |

| Sample | well  | Average | Threshold Index |
|--------|-------|---------|-----------------|
| 42     | 0.077 | 0.077   | 0.31            |
| 43     | 0.073 | 0.073   | 0.29            |
| 44     | 0.069 | 0.069   | 0.28            |
| 45     | 0.076 | 0.076   | 0.30            |
| 46     | 0.081 | 0.081   | 0.32            |
| 47     | 0.113 | 0.113   | 0.45            |
| 48     | 0.077 | 0.077   | 0.31            |
| 49     | 0.112 | 0.112   | 0.45            |
| 50     | 0.093 | 0.093   | 0.37            |
| 51     | 0.085 | 0.085   | 0.34            |
| 52     | 0.075 | 0.075   | 0.30            |
| 53     | 0.098 | 0.098   | 0.39            |
| 54     | 0.100 | 0.1     | 0.40            |
| 55     | 0.076 | 0.076   | 0.30            |
| 56     | 0.074 | 0.074   | 0.30            |
| 57     | 0.112 | 0.112   | 0.45            |
| 58     | 0.080 | 0.08    | 0.32            |
| 59     | 0.083 | 0.083   | 0.33            |
| 60     | 0.088 | 0.088   | 0.35            |
| 61     | 0.099 | 0.099   | 0.40            |
| 62     | 0.113 | 0.113   | 0.45            |

|    |       |        |      |
|----|-------|--------|------|
| 63 | 0.127 | 0.127  | 0.51 |
| 64 | 0.173 | 0.173  | 0.69 |
| 65 | 0.080 | 0.08   | 0.32 |
| 66 | 0.071 | 0.071  | 0.28 |
| 67 | 0.085 | 0.085  | 0.34 |
| 68 | 0.078 | 0.078  | 0.31 |
| 69 | 0.083 | 0.083  | 0.33 |
| 70 | 0.071 | 0.071  | 0.28 |
| 71 | 0.077 | 0.079  | 0.32 |
|    | 0.081 |        |      |
| 72 | 0.078 | 0.0835 | 0.33 |
|    | 0.089 |        |      |
| 73 | 0.081 | 0.0835 | 0.33 |
|    | 0.086 |        |      |
| 74 | 0.088 | 0.083  | 0.33 |
|    | 0.078 |        |      |
